# Supplementary material
Source: PubMed Central journal article supplement (PMC3347671)
Supplement: supp_2011.051441_2011_051441-Contributions.pdf [file supp_2011.051441_2011_051441-Contributions.pdf]

**Manuscript no. HAEMATO/2011/051441 entitled “Benefit from autologous stem cell transplantation in primary refractory myeloma?: different outcomes in progressive versus stable disease“**

**Authors: Laura Rosiñol, Ramón García-Sanz, Juan José Lahuerta, Miguel Hernández-García, Miquel Granell, Javier de la Rubia, Albert Oriol, Belén Hernández-Ruiz, Consuelo Rayón, Isabel Navarro, Juan Carlos García-Ruiz, Joan Besalduch, Santiago Gardella, Javier López Jiménez, Joaquín Díaz-Mediavilla, Adrián Alegre, Jesús San Miguel, Joan Bladé**

**Information about the contributions of each person named as having participated in the study**

- 1) Guarantor(s)**, i.e., person(s) who is (are) responsible for the integrity of the work as a whole:
- Laura Rosiñol, Hospital Clínic de Barcelona, lrosinol@clinic.ub.es
  - Joan Bladé, Hospital Clínic de Barcelona, jblade@clinic.ub.es

According to the International Committee of Medical Journal Editors (ICMJE) ([http://www.icmje.org/ethical\\_1author.html](http://www.icmje.org/ethical_1author.html)): “*Authorship credit should be based on: 1) substantial contributions to conception and design, acquisition of data, or analysis and interpretation of data; 2) drafting the article or revising it critically for important intellectual content; and 3) final approval of the version to be published. Authors should meet conditions 1, 2, and 3 ..... Acquisition of funding, collection of data, or general supervision of the research group alone does not constitute authorship*”.

**The guarantors of this manuscript confirm that all persons designated as authors qualify for authorship, and that each author has participated sufficiently in the work to take public responsibility for appropriate portions of the content.**

**2) Authors who participated in the conception of the study:** Laura Rosiñol, Joan Bladé, Ramón García-Sanz, Juan José Lahuerta, Jesús San Miguel

**3) Design & Methods.** The following authors were responsible for specific investigations (please detail):

- Laura Rosiñol, Joan Bladé, Ramón García-Sanz, Juan José Lahuerta and Jesús San Miguel were responsible for the design of the study

**4) Results.** The following authors were responsible for specific portions of the results, including figures and tables (please indicate the person responsible for each figure and each table):

- Laura Rosiñol was responsible of all figures and tables
- Laura Rosiñol, Ramón García-Sanz, Juan José Lahuerta, Miguel Hernández-García, Miquel Granell, Javier de la Rubia, Albert Oriol, Belén Hernández-Ruiz, Consuelo Rayón, Isabel Navarro, Juan Carlos García-Ruiz, Joan Besalduch, Santiago Gardella, Javier López Jiménez, Joaquín Díaz-Mediavilla, Adrián Alegre, Jesús San Miguel, Joan Bladé collaborate in including patients, collection of the data and were responsible of the approval of the final version

**5) Writing the manuscript.** The following authors were responsible for writing the manuscript:

- Laura Rosiñol, Joan Bladé, Ramón García-Sanz, Juan José Lahuerta and Jesús San Miguel were responsible for writing the manuscript
- Miguel Hernández-García, Miquel Granell, Javier de la Rubia, Albert Oriol, Belén Hernández-Ruiz, Consuelo Rayón, Isabel Navarro, Juan Carlos García-Ruiz, Joan Besalduch, Santiago Gardella, Javier López Jiménez, Joaquín Díaz-Mediavilla, Adrián Alegre, were responsible of reviewing last drafts and incorporating suggestions and criticisms

**6) Contributors Listed in Acknowledgments:**

This work has been supported in part by Spanish Grants from Instituto Carlos III RD06/0020/005 and 0006, 0031,0101,1056 and from grant 08/0147.
